# Supplementary material for: Viral Communities of Shark Bay Modern Stromatolites
Source: Front Microbiol. 2018 Jun 13;9:1223. doi: 10.3389/fmicb.2018.01223 (PMC6008428; doi:10.3389/fmicb.2018.01223)
Supplement: Supplementary file 1 [file Data_Sheet_1.xlsx]

## Sheet: sup_table1
Virus_name	viral_fraction		Virus_name	cellular_fraction
Gokushovirinae Fen672_31	9.34566		Enterobacteria phage M13	15.0354
Gokushovirinae Bog1183_53	8.90006		Enterobacteria phage Ike	12.314
Fiddler Crab associated circular virus	8.86448		Microviridae Fen7918_21	4.38429
Bdellovibrio phage phiMH2K	7.71349		Gokushovirinae Fen672_31	4.33609
Chlamydia phage Chp2	4.42933		Gokushovirinae Bog1183_53	3.63835
Sewage-associated circular DNA virus-18	4.26773		Verbesina encelioides leaf curl alphasatellite	3.39721
Circoviridae 3 LDMD-2013	3.97955		Ralstonia phage p12J	2.66317
Chlamydia phage 4	3.85987		Sewage-associated circular DNA virus-30	2.42721
Lake Sarah-associated circular molecule 10	3.41646		Chlamydia phage Chp2	2.31687
Verbesina encelioides leaf curl alphasatellite	2.43058		Sewage-associated circular DNA virus-18	2.30827
Sewage-associated circular DNA virus-19	2.20002		Parabacteroides phage YZ-2015b	2.13217
Lake Sarah-associated circular virus-8	2.08044		Parabacteroides phage YZ-2015a	1.97138
Chlamydia phage CPAR39	1.93642		Circoviridae 3 LDMD-2013	1.90742
Marine gokushovirus	1.88389		Chlamydia phage 4	1.87102
Parabacteroides phage YZ-2015a	1.74011		Propionibacterium phage B5	1.86859
Gokushovirinae Bog5712_52	1.71342		Vibrio phage VEJphi	1.63838
Chlamydia phage phiCPG1	1.43859		Vibrio phage Vf33	1.63623
Gokushovirinae Bog8989_22	1.42791		Bdellovibrio phage phiMH2K	1.6069
Microviridae Fen7940_21	1.37357		Vibrio phage CTX	1.44878
Dragonfly-associated microphage 1	1.30826		Lake Sarah-associated circular virus-8	1.44661
Gokushovirinae GNX3R	1.19804		Gokushovirinae Bog5712_52	1.43762
Gokushovirinae GAIR4	1.17552		Avon-Heathcote Estuary associated circular virus 5	1.3854
Microviridae Fen7918_21	1.15582		Vibrio phage fs1	1.32249
Gokushovirinae Fen7875_21	1.10543		Chlamydia phage CPAR39	0.985371
Grapevine red blotch-associated virus	0.953913		Microviridae Fen7940_21	0.920987
Sewage-associated circular DNA virus-30	0.848933		Sewage-associated circular DNA virus-19	0.919459
Farfantepenaeus duorarum pink shrimp associated circular virus	0.813029		Microviridae Fen7895_21	0.906423
Avon-Heathcote Estuary associated circular virus 3	0.801007		Gokushovirinae Bog8989_22	0.861258
Circovirus-like genome DCCV-8	0.702203		Microviridae Bog9017_22	0.721914
Circovirus-like genome DHCV-2	0.698847		Microviridae Fen7786_21	0.719603
Parabacteroides phage YZ-2015b	0.664703		Vibrio phage KSF-1phi	0.666823
Circovirus-like genome RW-E	0.64524		Gokushovirinae GNX3R	0.639855
Avon-Heathcote Estuary associated circular virus 5	0.628235		Vibrio phage VGJphi	0.628363
Chimpanzee faeces associated microphage 1	0.603026		Grapevine red blotch-associated virus	0.596966
Chimpanzee faeces associated microphage 3	0.477155		Marine gokushovirus	0.573881
Circovirus-like genome DCCV-3	0.463673		Chlamydia phage phiCPG1	0.543319
Sewage-associated circular DNA virus-15	0.414228		Gokushovirinae Fen7875_21	0.491993
Chlamydia phage Chp1	0.381698		Microviridae Bog1249_12	0.409511
Propionibacterium phage B5	0.378008		Gokushovirinae GAIR4	0.407953
Calanoida sp. copepod associated circular virus	0.376983		Microviridae Fen2266_11	0.39661
Lake Sarah-associated circular virus-44	0.357073		Chimpanzee faeces associated microphage 3	0.381553
African cassava mosaic virus	0.314115		Enterobacteria phage If1	0.377311
Gossypium davidsonii symptomless alphasatellite	0.252789		Circoviridae 21 LDMD-2013	0.357243
Hermit crab associated circular genome	0.250174		Ralstonia phage 1 NP-2014	0.355498
Microviridae Fen7786_21	0.241191		Circovirus-like genome DCCV-4	0.335847
Avon-Heathcote Estuary associated circular virus 23	0.239642		Microviridae Fen418_41	0.331473
Beak and feather disease virus	0.23351		African cassava mosaic virus	0.314664
Porcine circovirus type 1/2a	0.225751		Circovirus-like genome RW-E	0.294835
Sewage-associated circular DNA virus-28	0.213088		Circovirus-like genome DHCV-2	0.287397
Circoviridae 5 LDMD-2013	0.204329		Dragonfly-associated microphage 1	0.285312
Circoviridae 21 LDMD-2013	0.202694		Lake Sarah-associated circular virus-44	0.279704
Duck faeces associated circular DNA virus 1	0.193407		Fiddler Crab associated circular virus	0.278706
Lake Sarah-associated circular molecule 5	0.190862		Microviridae Bog5275_51	0.264987
Nepavirus	0.18874		CHIV14	0.261137
Ctenophore-associated circular virus 2	0.179395		Sewage-associated circular DNA virus-28	0.255592
Lake Sarah-associated circular virus-45	0.160312		Enterobacteria phage P4	0.227371
Avon-Heathcote Estuary associated circular virus 22	0.157619		Microviridae Fen685_11	0.215407
Lake Sarah-associated circular virus-27	0.147348		Circovirus-like genome RW-A	0.21077
Palaemonetes kadiakensis Mississippi grass shrimp associated circular virus	0.140335		Eragrostis minor streak virus	0.203355
Circovirus-like genome DCCV-4	0.133635		Enterobacteria phage I2-2	0.202706
Microviridae Bog9017_22	0.128099		Chimpanzee faeces associated microphage 1	0.187872
Circovirus-like genome RW-A	0.123004		Pseudoalteromonas phage PM2	0.180845
Microviridae Fen2266_11	0.121821		Microviridae Fen4707_41	0.180191
Microviridae Fen7895_21	0.120224		Vibrio phage VfO4K68	0.171931
Lake Sarah-associated circular molecule 6	0.119467		Dragonfly cyclovirus 5	0.153257
Microviridae Fen4707_41	0.116843		Chlamydia phage Chp1	0.149496
Chimpanzee faeces associated microphage 2	0.115423		Circovirus-like genome DCCV-8	0.137513
Avon-Heathcote Estuary associated circular virus 1	0.113131		Vibrio phage VFJ	0.117183
Ctenophore-associated circular genome 4	0.10989		Planktothrix phage PaV-LD	0.114759
Microviridae Bog1249_12	0.104557		Natrialba phage PhiCh1	0.11373
Lake Sarah-associated circular virus-19	0.103289		Ctenophore-associated circular virus 4	0.106344
Sewage-associated circular DNA virus-24	0.102086		Vibrio phage VSK	0.105942
Sewage-associated circular DNA virus-26	0.0992885		Chimpanzee faeces associated microphage 2	0.105482
Eragrostis minor streak virus	0.0988971		Avon-Heathcote Estuary associated circular virus 3	0.102941
Cotton leaf curl Multan virus satellite U36-1	0.0984942		Bacillus phage Shanette	0.100405
Sewage-associated circular DNA virus-16	0.0976743		Ralstonia phage PE226	0.0998759
Avon-Heathcote Estuary associated circular virus 19	0.0955224		Artemia melana sponge associated circular genome	0.0998212
Microviridae Bog5275_51	0.0828456		Avon-Heathcote Estuary associated circular virus 15	0.0970572
Microviridae Fen418_41	0.0806025		Canary circovirus	0.0933778
Circovirus-like genome RW-C	0.0737478		Vibrio phage PV94	0.088906
Artemia melana sponge associated circular genome	0.0728188		Sewage-associated circular DNA molecule	0.0876315
Duck faeces associated circular DNA virus 2	0.072069		Burkholderia phage KS14	0.0874227
Bovine faeces associated circular DNA virus 2	0.0716933		Lake Sarah-associated circular molecule 5	0.0872122
Avon-Heathcote Estuary associated circular virus 15	0.0708026		Circoviridae 9 LDMD-2013	0.0861135
Circovirus-like genome RW-B	0.0707523		Lake Sarah-associated circular molecule 7	0.083154
Dragonfly orbiculatusvirus	0.0694346		Lake Sarah-associated circular virus-3	0.0820867
Lake Sarah-associated circular virus-10	0.0694346		Enterobacteria phage G4 sensu lato	0.0817077
Silurus glanis circovirus	0.0676334		Hermit crab associated circular virus	0.0795607
Circoviridae 9 LDMD-2013	0.0628192		Dragonfly larvae associated circular virus-2	0.0760106
Lake Sarah-associated circular molecule 3	0.0614451		Enterobacteria phage mEp460	0.0716645
Avon-Heathcote Estuary associated circular virus 8	0.0608824		Sewage-associated circular DNA virus-24	0.0699706
Spiroplasma phage SVTS2	0.0584471		Ralstonia phage RSS1	0.0684004
Circoviridae 2 LDMD-2013	0.0556503		Enterobacteria phage phiX174 sensu lato	0.0676842
Dragonfly larvae associated circular virus-2	0.0554492		Duck faeces associated circular DNA virus 1	0.0662813
Ctenophore-associated circular genome 1	0.0549451		Dragonfly-associated alphasatellite	0.0616205
Tobacco necrosis satellite virus	0.0536591		Enterobacteria phage fd	0.0568894
Circo-like virus-Brazil hs1	0.0526394		Brevibacillus phage Jenst	0.0562657
Idiomarinaceae phage 1N2-2	0.0516222		Acartia tonsa copepod circovirus	0.0545729
Sewage-associated circular DNA virus-27	0.0504046		Cellulophaga phage phi48:2	0.0545123
Escherichia phage vB_EcoM-ep3	0.0502344		Sewage-associated circular DNA virus-26	0.0544425
Circoviridae 1 LDMD-2013	0.0495776		Vibrio phage fs2	0.0526741
Sewage-associated circular DNA virus-32	0.0490473		Avon-Heathcote Estuary associated circular virus 1	0.0516941
Ageratum yellow vein Singapore alphasatellite	0.048885		Avon-Heathcote Estuary associated circular virus 21	0.0515188
Lake Sarah-associated circular virus-40	0.0484221		Bat circovirus	0.0506878
Gossypium darwinii symptomless alphasatellite	0.0482465		Circovirus-like genome DCCV-3	0.0488931
Acartia tonsa copepod circovirus	0.0398105		Pseudoalteromonas Phage H103	0.0485331
Ctenophore-associated circular virus 4	0.0387886		Vibrio phage vB_VpaM_MAR	0.0484875
Porcine circovirus 2	0.0376039		Palaemonetes kadiakensis Mississippi grass shrimp associated circular virus	0.0480933
Dragonfly cyclovirus 5	0.0372666		Lake Sarah-associated circular virus-10	0.047591
Pseudoalteromonas Phage H103	0.0369439		Burkholderia phage KL3	0.047192
Lake Sarah-associated circular virus-50	0.0368943		Avon-Heathcote Estuary associated circular virus 10	0.0460054
Avon-Heathcote Estuary associated circular virus 29	0.0364294		Llama faeces associated circular DNA virus-1	0.0455228
Circovirus-like genome DCCV-9	0.0363696		Eel River basin pequenovirus	0.0449466
Ctenophore-associated circular virus 1	0.036015		Acinetobacter phage Bphi-B1251	0.0441982
Pseudoalteromonas phage Pq0	0.0358306		Avon-Heathcote Estuary associated circular virus 22	0.0432132
Marinomonas phage P12026	0.0355796		Circovirus-like genome CB-A	0.0421929
Callinectes sapidus associated circular virus	0.035439		Avon-Heathcote Estuary associated circular virus 8	0.0417293
Barbel circovirus	0.0339722		Circovirus-like genome DCCV-2	0.041672
Avon-Heathcote Estuary associated circular virus 7	0.0336456		Shigella phage SfIV	0.0412612
Gammarus sp. amphipod associated circular virus	0.0332584		Salmonella phage SJ46	0.0405268
Avon-Heathcote Estuary associated circular virus 24	0.0331259		Lake Sarah-associated circular virus-27	0.0403975
Didemnum sp. Sea Squirt associated virus	0.0322579		Cyanoramphus nest associated circular X DNA virus	0.0394873
Canine circovirus	0.0322267		Calanoida sp. copepod associated circular virus	0.0369124
Sewage-associated circular DNA virus-20	0.0318256		Sewage-associated circular DNA virus-2	0.0360082
Avon-Heathcote Estuary associated circular virus 6	0.0317193		Pseudomonas phage vB_PaeM_C1-14_Ab28	0.0358042
Ralstonia phage 1 NP-2014	0.0314343		Lake Sarah-associated circular virus-32	0.035796
Cellulophaga phage phi17:1	0.030862		Bovine faeces associated smacovirus 6	0.0354894
Circovirus-like genome DCCV-2	0.0303995		Macroptilium bright mosaic virus	0.0345739
Ralstonia phage RSM3	0.0297832		Sewage-associated circular DNA virus-27	0.0345477
Palaemonetes sp. common grass shrimp associated circular virus	0.0294566		Eragrostis curvula streak virus	0.0330925
Mycobacterium phage Luchador	0.0286422		Circovirus-like genome RW-B	0.0323295
Microviridae Fen685_11	0.0285705		Pseudomonas phage Pf3	0.0312487
Vibrio phage PV94	0.0275148		Lake Sarah-associated circular virus-49	0.0311366
Sulfolobales Mexican fusellovirus 1	0.0268675		Vibrio phage VfO3K6	0.0311259
Sewage-associated circular DNA virus-2	0.0262677		Lake Sarah-associated circular virus-6	0.0310094
Circovirus-like genome DCCV-5	0.026247		Pseudomonas phage phi3	0.0307168
Lake Sarah-associated circular virus-32	0.026113		Brevibacillus phage Sundance	0.0305441
Ungulate bocaparvovirus 6	0.0254531		Synechococcus phage S-CBS4	0.0301951
Avon-Heathcote Estuary associated circular virus 27	0.0252597		Lactococcus phage bIL312	0.0300207
Macroptilium bright mosaic virus	0.0252214		Bacillus phage Stahl	0.0295647
Circoviridae 13 LDMD-2013	0.0250126		Bacillus phage SPBc2	0.0291549
Chamois faeces associated circular DNA virus 1	0.0247703		Halomonas phage phiHAP-1	0.027867
Enterobacteria phage phiX174 sensu lato	0.0246876		Mycobacterium phage Panchino	0.0272263
McMurdo Ice Shelf pond-associated circular DNA virus-4	0.0246418		Vibrio phage VP882	0.0262456
Mycobacterium phage Lockley	0.0245384		Streptococcus phage 20617	0.0261458
Ageratum yellow vein Taiwan virus	0.0243173		Lactobacillus phage A2	0.0251927
Tomato leaf curl Seychelles virus	0.0242464		Bacillus phage SP-15	0.0250525
Ralstonia phage phiRSA1	0.0240137		Staphylococcus phage phiN315	0.0248092
Enterococcus phage IME-EFm5	0.0235953		Bacillus phage G	0.0245467
Sewage-associated circular DNA virus-33	0.0233604		Prochlorococcus phage P-TIM68	0.0244742
Stenotrophomonas phage phiSHP2	0.0228505		Bacillus phage phi4J1	0.0241649
Lake Sarah-associated circular virus-30	0.0221391		Escherichia phage vB_EcoM-ep3	0.0236713
Mycobacterium phage Squirty	0.0220564		Streptococcus pyogenes phage 315.1	0.0230504
Puniceispirillum phage HMO-2011	0.0216473		Reticuloendotheliosis virus	0.0219739
CHIV14	0.0211664		Gordonia phage McGonagall	0.0212949
Celeribacter phage P12053L	0.0205149		Mimivirus terra2	0.0208938
Ruegeria phage DSS3-P1	0.0200786		Salisaeta icosahedral phage 1	0.0208132
Mycobacterium phage Gaia	0.0198437		Ectocarpus siliculosus virus 1	0.0187383
Enterobacteria phage Fels-2	0.0197322		Bacillus phage vB_BtS_BMBtp3	0.0183933
Circoviridae 4 LDMD-2013	0.0195943		Phormidium phage MIS-PhV1A	0.0180144
Pelagibacter phage HTVC010P	0.0190541		Staphylococcus phage SPbeta-like	0.0178383
Labidocera aestiva circovirus	0.0188446		Feldmannia species virus	0.0176803
Geobacillus phage GBK2	0.0187144		Y73 sarcoma virus	0.0175668
Clostridium phage phiCT19406C	0.0186213		Mungbean yellow mosaic virus	0.0168834
Halovirus HSTV-1	0.0185887		Enterobacteria phage ID2 Moscow/ID/2001	0.0166126
Thermococcus prieurii virus 1	0.0184745		Synechococcus phage S-CBS3	0.0165683
Lactobacillus phage AQ113	0.0181818		Enterobacteria phage phi92	0.0165578
Cellulophaga phage phi48:2	0.0170427		Microvirus CA82	0.0165282
Phage phiJL001	0.0167126		Lactobacillus phage phiAT3	0.0162885
Enterobacteria phage P88	0.0167072		Enterobacteria phage fiAA91-ss	0.0162609
Burkholderia phage KS14	0.0164579		Enterobacteria phage Fels-2	0.0162295
Clostridium phage phiCT453B	0.0162986		Bacillus phage BalMu-1	0.0159997
Verrucomicrobia phage P8625	0.0161692		Paenibacillus phage Vegas	0.0159703
Synechococcus phage S-CBP1	0.0157114		Pseudoalteromonas phage BS5	0.0159693
Mesorhizobium phagevB_MloP_Lo5R7ANS	0.0145421		Sodalis phage phiSG1	0.0157247
Enterobacteria phage Mu	0.0144856		Clostridium phage phiCTC2A	0.015506
Lactococcus Phage ASCC191	0.0143575		Sclerophthora macrospora virus A	0.0154836
Sulfolobus monocaudavirus SMV3	0.0134367		Bathycoccus sp. RCC1105 virus BpV1	0.0151497
Enterobacteria phage PRD1	0.0133617		Microcystis phage MaMV-DC	0.0150797
Erwinia phage Era103	0.0131665		Paenibacillus phage Tripp	0.015067
Lactococcus phage bIL312	0.0131399		Enterobacteria phage St-1	0.0149552
Pseudomonas phage vB_PaeM_C1-14_Ab28	0.0130594		Sputnik virophage	0.0149054
Streptococcus phage phiARI0468-1	0.0129525		Acidianus filamentous virus 7	0.014821
Mungbean yellow mosaic virus	0.0123163		Microcystis phage Ma-LMM01	0.014617
Vibrio phage VP93	0.0121069		Vibrio phage VP93	0.0145218
Microvirus CA82	0.0120572		Ralstonia phage phiRSA1	0.0141079
Shigella phage SfIV	0.0117054		Vibrio phage martha 12B12	0.0136937
Pseudoalteromonas phage BS5	0.0116495		Mamastrovirus 1	0.0136575
Pseudomonas phage PAJU2	0.0113473		Cronobacter phage ENT47670	0.0133994
Eel River basin pequenovirus	0.0109294		Paenibacillus phage Xenia	0.0132888
Pseudoalteromonas phage H105/1	0.0108453		Enterobacteria phage YYZ-2008	0.0132814
Mycobacterium phage Charlie	0.0108139		Phormidium phage MIS-PhV1B	0.0132431
Croceibacter phage P2559Y	0.0107845		Bacillus phage 0305phi8-36	0.0129037
Pseudomonas phage PA11	0.0107147		Stenotrophomonas phage phiSMA7	0.0128925
Streptococcus phage phiNJ2	0.0106996		Streptomyces phage Nanodon	0.0127383
Aeromonas phage vB_AsaM-56	0.010686		Streptomyces phage Zemlya	0.0124901
Pseudomonas phage PPpW-3	0.0106828		Lactococcus phage P335 sensu lato	0.0124517
Streptococcus phage T12	0.010504		Yellowstone lake mimivirus	0.0123678
Enterobacteria phage SfI	0.010391		Synechococcus phage S-SKS1	0.012268
Cellulophaga phage phi12a:1	0.010263		Mycobacterium phage Squirty	0.0120941
Enterococcus phage EFC-1	0.00990174		Mesorhizobium phagevB_MloP_Lo5R7ANS	0.0119607
Microcystis phage MaMV-DC	0.00982189		Enterococcus phage EF62phi	0.0119504
Salicola phage CGphi29	0.00980223		Cellulophaga phage phi14:2	0.0117985
Geobacillus virus E2	0.00976193		Enterobacteria phage Sf6	0.0116713
Enterococcus phage Ec-ZZ2	0.00968913		Vibrio phage pYD21-A	0.0116551
Sulfitobacter phage NYA-2014a	0.0094769		Flavobacterium phage 6H	0.0116399
Archaeal BJ1 virus	0.00943677		Bacteroides phage B124-14	0.0115953
Stenotrophomonas phage phiSMA7	0.00940495		Faba bean necrotic stunt virus	0.0115261
Streptococcus phage 5093	0.00893981		Cyanophage KBS-S-2A	0.0112077
Cronobacter phage phiES15	0.00831586		Pseudoalteromonas phage Pq0	0.0109149
Synechococcus phage S-CBS2	0.00827231		Equine infectious anemia virus	0.0109028
Streptococcus phage P9	0.00819996		Lactococcus phage P087	0.0106195
Enterobacteria phage J8-65	0.00811152		Lactococcus phage Q54	0.010303
Synechococcus phage S-CBS3	0.00805764		Burkholderia phage phiE125	0.0102453
Yellowstone Lake virophage 6	0.00803039		Azospirillum phage Cd	0.010234
Enterobacteria phage HK106	0.00801625		Burkholderia phage phiE202	0.0101997
Xanthomonas phage vB_XveM_DIBBI	0.00798107		Burkholderia phage phi1026b	0.00996665
Pelagibacter phage HTVC019P	0.00789892		Streptomyces phage phiSASD1	0.00983455
Clostridium phage phi CD119	0.00748057		Microbacterium phage Min1	0.00982818
Phormidium phage MIS-PhV1A	0.00730076		Rose yellow vein virus	0.00978492
Synechococcus phage Syn5	0.00719302		Cellulophaga phage phi39:1	0.00950661
Bacillus phage TP21-L	0.00709992		Only Syngen Nebraska virus 5	0.00947173
Brucella phage BiPBO1	0.00709128		Bacillus phage vB_BhaS-171	0.00935335
Cyanophage 9515-10a	0.00706446		Salmonella phage vB_SosS_Oslo	0.0092777
Erwinia phage phiEt88	0.00703099		Podovirus Lau218	0.00924659
Cyanophage NATL2A-133	0.00699297		Diadromus pulchellus ascovirus 4a	0.00916385
Vibrio phage VP882	0.00696218		Cafeteria roenbergensis virus BV-PW1	0.00915127
Hydrogenobaculum phage 1	0.00687134		Streptomyces phage Izzy	0.00909312
Polaribacter phage P12002L	0.00682737		Geobacillus virus E3	0.00902995
Tetraselmis viridis virus S20	0.00682111		Mycobacterium phage Papyrus	0.00902893
Cellulophaga phage phi18:1	0.00678595		Euphorbia ringspot virus	0.00897545
Pseudoalteromonas phage PM2	0.00659625		Stx2-converting phage 1717	0.00879882
Enterobacteria phage HK140	0.00653241		Cellulophaga phage phi38:1	0.00879528
Staphylococcus phage vB_SepS_SEP9	0.00647448		Shigella phage SfII	0.00878956
Vibrio phage vB_VpaM_MAR	0.00643115		Yellowstone lake phycodnavirus 1	0.00869128
Enterobacteria phage ST104	0.00642493		Edwardsiella phage MSW-3	0.00852821
Cellulophaga phage phi38:1	0.0064161		Staphylococcus phage StauST398-4	0.00849641
Cellulophaga phage phi46:3	0.00637855		Salmonella phage epsilon34	0.00847468
Mannheimia phage vB_MhS_1152AP2	0.00637561		Vibrio phage VHML	0.00843898
Lactobacillus phage phig1e	0.00629297		Verrucomicrobia phage P8625	0.00831186
Enterobacteria phage phiP27	0.00624626		Streptococcus phage SM1	0.00788107
Bacteroides phage B40-8	0.00591899		Lactobacillus phage PLE2	0.00779657
Escherichia phage ECBP5	0.0058572		Anomala cuprea entomopoxvirus	0.00778893
Enterobacteria phage P4	0.00571951		Pseudomonas phage YuA	0.00776782
Pseudomonas phage PaMx74	0.00566908		Mycobacterium phage Enkosi	0.00771665
Vibrio phage pYD21-A	0.00566819		Enterobacteria phage P88	0.00763417
Citrobacter phage CVT22	0.00558264		Acholeplasma phage L2	0.00761694
Lactococcus phage 98201	0.00550939		Gordonia phage CaptainKirk2	0.0076109
Rhodoferax phage P26218	0.00549224		Enterobacteria phage Mu	0.00744642
Tetrasphaera phage TJE1	0.00540308		Pelagibacter phage HTVC008M	0.00742539
Streptococcus phage Sfi19	0.00533719		Deep-sea thermophilic phage D6E	0.00738922
Streptococcus phage DCC1738	0.00519511		Escherichia phage D108	0.00734283
Vibrio phage VvAW1	0.00515617		Enterobacteria phage vB_EcoM-FV3	0.00732038
Cellulophaga phage phi12:1	0.00509479		Aeropyrum pernix spindle-shaped virus 1	0.00718574
Salmonella phage 9NA	0.00503006		Edwardsiella phage PEi20	0.00718246
Roseobacter phage SIO1	0.00499902		Aureococcus anophagefferens virus	0.00712543
Pelagibacter phage HTVC011P	0.00499614		Macaque simian foamy virus	0.00702565
Cellulophaga phage phi10:1	0.00495555		Pseudomonas phage vB_PaeS_PM105	0.00690552
Bacillus phage Stills	0.00493702		Staphylococcus phage P954	0.00670764
Ralstonia phage RSK1	0.00492824		Clostridium phage phiCD38-2	0.00665394
Microcystis phage Ma-LMM01	0.0049214		Brochothrix phage BL3	0.00658534
Salmonella phage ST160	0.00486632		Bacillus phage CP-51	0.00657277
Streptococcus phage phiARI0004	0.00485223		Thermus phage P74-26	0.00656297
Paenibacillus phage Xenia	0.00484704		Bordetella phage BPP-1	0.00643424
Mycobacterium phage Minerva	0.00484085		Vibrio phage VP58.5	0.00641627
Synechococcus phage S-SKS1	0.00479433		Loktanella phage pCB2051-A	0.00640028
Escherichia phage K1-dep(1)	0.00479081		Synechococcus phage S-CBS2	0.00629989
Enterobacter phage Arya	0.00475812		Pseudomonas phage PPpW-3	0.00627606
Paracoccus phage vB_PmaS_IMEP1	0.00473834		Escherichia phage pro483	0.00623434
Pseudomonas phage AF	0.00467218		Psophocarpus tetragonolobus endornavirus	0.00623242
Cellulophaga phage phi18:3	0.00465291		Clostridium phage phiCTP1	0.00615799
Pantoea phage LIMEzero	0.00463494		Croceibacter phage P2559S	0.0060774
Shewanella sp. phage 1/41	0.00458402		Cyanophage MED4-213	0.00604298
Bacteriophage Sitara	0.00456159		Gordonia phage GTE2	0.00600506
Pseudoalteromonas phage RIO-1	0.00454516		Cellulophaga phage phi19:3	0.00599631
Pseudomonas phage NP1	0.00454076		Micromonas sp. RCC1109 virus MpV1	0.00594063
Bacteriophage Lily	0.00443697		Oenococcus phage phiS11	0.00591247
Erwinia phage vB_EamP_Frozen	0.00442357		Clostridium phage c-st	0.00588983
Rhodococcus phage ReqiDocB7	0.00438708		Salmonella phage 118970_sal3	0.00588929
Synechococcus phage S-CBS1	0.00438373		Cyanophage 9515-10a	0.00581044
Pseudomonas phage vB_PaeP_Tr60_Ab31	0.00437872		Enterobacteria phage P1	0.00576815
Sulfolobus spindle-shaped virus 5	0.00433683		Vibrio phage pYD38-A	0.00574971
Shewanella sp. phage 1/40	0.00430457		Lactococcus Phage ASCC191	0.00562329
Salmonella phage 118970_sal3	0.00429619		Mycobacterium phage Shipwreck	0.00561763
Roseobacter phage RDJL Phi 1	0.00424354		Polaribacter phage P12002L	0.00561544
Iodobacteriophage phiPLPE	0.00420312		Riemerella phage RAP44	0.00554259
Aurantimonas phage AmM-1	0.00417261		Lactobacillus phage JCL1032	0.00553093
Listeria phage B054	0.00414039		Pseudomonas phage PA11	0.00550797
Pseudomonas phage D3	0.00412389		Prochlorococcus phage P-SSM7	0.00550282
Cyanophage S-TIM5	0.00411816		Bacillus phage PM1	0.00537564
Pseudomonas phage PS-1	0.00409836		Temperate phage phiNIH1.1	0.00536717
Escherichia phage HK639	0.00402313		Aeromonas phage phiO18P	0.00536335
Vibrio phage K139	0.00401641		Micromonas pusilla virus 12T	0.0053187
Sinorhizobium phage phiLM21	0.00392411		Mycobacterium phage Lockley	0.00531121
Thermus thermophilus bacteriophage P23-77	0.00390254		Cellulophaga phage phi46:1	0.00523113
Gordonia phage McGonagall	0.00388362		Mycobacterium phage 40AC	0.00512043
Persicivirga phage P12024L	0.00372959		Mannheimia phage vB_MhM_587AP1	0.00509656
Persicivirga phage P12024S	0.00372457		Halovirus HGTV-1	0.00506826
Pseudomonas phage vB_PaeS_PMG1	0.00369189		Rhodobacter phage RcRhea	0.00505403
Clostridium phage phiZP2	0.0036776		Clostridium phage phiZP2	0.00504131
Enterococcus phage phiFL2A	0.00366604		Paramecium bursaria Chlorella virus AR158	0.00502362
Lactococcus phage P335 sensu lato	0.00363338		Chrysochromulina ericina virus	0.00500373
Sputnik virophage	0.00362447		Burkholderia phage phiE255	0.00486764
Rhodothermus phage RM378	0.00358242		Bacillus phage TP21-L	0.00486634
Enterobacteria phage mEp235	0.00353683		Dinoroseobacter phage DFL12phi1	0.00485881
Lactococcus phage TP901-1	0.00353007		Streptococcus phage Dp-1	0.00483861
Loktanella phage pCB2051-A	0.00350172		Pseudomonas phage vB_PaeS_PAO1_Ab18	0.00483595
Gordonia phage GordTnk2	0.00349974		Phage phi OH2	0.00478421
Listeria phage A006	0.00348776		Enterobacteria phage BP-4795	0.00471967
Streptococcus pyogenes phage 315.5	0.00348027		Hydrogenobaculum phage 1	0.00470967
Vibrio phage douglas 12A4	0.00346203		Synechococcus phage S-CAM9	0.00469159
Escherichia phage CICC 80001	0.00342611		Tetraselmis viridis virus S20	0.00467524
Phaeocystis globosa virus virophage	0.0034047		Pseudomonas phage NP1	0.00466841
Pseudomonas phage phiPsa374	0.00339528		Geobacillus phage GBK2	0.00466435
Mycobacterium phage Florinda	0.00335685		Actinoplanes phage phiAsp2	0.00466268
Halorubrum phage CGphi46	0.00334223		Enterobacteria phage phiV10	0.00466125
Burkholderia phage KS9	0.00333285		Cellulophaga phage phi12:1	0.00465601
Streptococcus pyogenes phage 315.6	0.00332302		Vibrio phage vB_VpaS_MAR10	0.00462911
Salmonella phage ST64B	0.00331184		Enterobacteria phage CAjan	0.00458204
Geobacillus virus E3	0.00329364		Prochlorococcus phage P-HM1	0.00453056
Acinetobacter phage vB_AbaS_TRS1	0.00326308		Stenotrophomonas phage S1	0.00452437
Bacillus phage SP10	0.00323216		Shigella phage 75/02 Stx	0.00449134
Gordonia phage GMA1	0.00322681		Vibrio phage SIO-2	0.00449038
Nitrincola phage 1M3-16	0.00322587		Pseudomonas phage YMC11/02/R656	0.00448809
Phormidium phage MIS-PhV1B	0.00322025		Streptomyces phage SF3	0.00448699
Salmonella phage SJ46	0.00321348		Cedratvirus A11	0.00448669
Vibrio phage X29	0.0031981		Salicola phage CGphi29	0.00447901
Escherichia phage vB_EcoM_ECO1230-10	0.00319126		Rhodococcus phage E3	0.00447491
Pseudomonas phage phi2	0.00317564		Streptococcus phage YMC-2011	0.00447209
Thermoanaerobacterium phage THSA-485A	0.00317057		Psychrobacter phage pOW20-A	0.00446716
Brevibacillus phage Jenst	0.00315734		Geobacillus virus E2	0.0044606
Mycobacterium phage Xeno	0.00313639		Bacillus phage phBC6A51	0.0044533
Ralstonia phage RSB1	0.00308659		Streptococcus pyogenes phage 315.2	0.0044379
Salisaeta icosahedral phage 1	0.00303661		Bacillus phage BCJA1c	0.00443574
Aggregatibacter phage S1249	0.00302404		Acanthocystis turfacea Chlorella virus 1	0.00442954
Xanthomonas phage phiL7	0.0030165		Enterobacteria phage ST104	0.0044037
Enterobacteria phage WV8	0.00300535		Synechococcus phage ACG-2014f	0.00439419
Lactococcus phage bIL67	0.00299543		Clostridium phage phiCD146	0.00439139
Vibrio phage vB_VchM-138	0.00298903		Gordonia phage Nyceirae	0.00435467
Cellulophaga phage phiSM	0.0029842		Salmonella phage SE1	0.00434595
Synechococcus phage S-RIP1	0.00296194		Paracoccus phage vB_PmaS_IMEP1	0.00433026
Croceibacter phage P2559S	0.00295562		Cronobacter phage vB_CsaM_GAP32	0.00431972
Bdellovibrio phage phi1422	0.00293176		Lactobacillus phage phig1e	0.00431325
Staphylococcus phage SA11	0.00292609		Escherichia phage PA2	0.004301
Cyanophage P-SSP2	0.00289752		Lactobacillus phage LF1	0.00427812
Enterobacteria phage RTP	0.0028769		Flavobacterium phage Fpv6	0.00425674
Synechococcus phage S-CBS4	0.0028731		Vibrio phage henriette 12B8	0.00425007
Microbacterium phage Min1	0.00286784		Haemophilus phage Aaphi23	0.00423567
Enterobacteria phage N15	0.00286722		Mycobacterium phage Charlie	0.00423537
Acinetobacter bacteriophage AP22	0.00286648		Enterobacteria phage DT57C	0.00421676
Flavobacterium phage 6H	0.00283041		Staphylococcus phage StauST398-5	0.00420945
Bacteroides phage B124-14	0.00281955		Aeromonas phage 44RR2.8t	0.00420007
Enterobacteria phage P1	0.00280522		Bacillus phage PfEFR-5	0.00416406
Salmonella phage IME207	0.00279554		Xanthomonas phage OP1	0.00416292
Cronobacter phage ENT47670	0.00279278		Gordonia phage Emalyn	0.00414427
Halovirus HGTV-1	0.00277294		Bacillus phage SPO1	0.00412502
Bacillus phage Stitch	0.0027337		Staphylococcus phage 85	0.00411611
Synechococcus phage S-CAM8	0.00271509		Vibrio phage vB_VchM-138	0.00409741
Helicobacter phage phiHP33	0.00269765		Cellulophaga phage phiSM	0.00409079
Deep-sea thermophilic phage D6E	0.00269519		Vibrio phage pVp-1	0.00408663
Cronobacter phage CR3	0.0026723		Staphylococcus phage phiPVL108	0.00406343
Bacillus phage Riggi	0.0026681		Salmonella phage E1	0.00404594
Mycobacterium phage Porky	0.00261362		Mycobacterium phage Gaia	0.00402992
Pseudomonas phage phiPSA1	0.00260261		Pseudomonas phage vB_PaeP_Tr60_Ab31	0.00400161
Salmonella phage SSU5	0.00257441		Human herpesvirus 8	0.00396336
Sinorhizobium phage phiN3	0.00257298		Gordonia phage Bantam	0.00393764
Bacillus phage Aurora	0.00256614		Brucella phage BiPBO1	0.00388834
Burkholderia phage BcepGomr	0.00253686		Acanthamoeba polyphaga moumouvirus	0.00383697
Salmonella phage BP63	0.00253575		Mycobacterium phage Muddy	0.00377941
Mycobacterium phage Papez	0.00253266		Cellulophaga phage phi13:2	0.003778
Halovirus HHTV-2	0.00252583		Bacillus phage vB_BanS-Tsamsa	0.00377767
Enterobacteria phage phiEcoM-GJ1	0.00251		Acidianus spindle-shaped virus 1	0.00376816
Burkholderia phage phiE125	0.00249128		Synechococcus phage S-PM2	0.00371456
Cyanophage PSS2	0.00247312		Helicobacter phage phiHP33	0.00369798
Brevibacillus phage Jimmer1	0.00244821		Myxococcus phage Mx8	0.00367977
Achromobacter phage JWF	0.00244602		Musca domestica salivary gland hypertrophy virus	0.00366662
Mimivirus terra2	0.00244553		Streptomyces phage Caliburn	0.00364919
Mycobacterium phage Omega	0.00239872		Streptomyces phage Lannister	0.00363348
Synechococcus phage S-PM2	0.00237103		Rhodococcus phage ReqiDocB7	0.00360833
Bathycoccus sp. RCC1105 virus BpV1	0.00234429		Streptomyces phage Lika	0.00355642
Lactococcus phage P008	0.00232965		Megavirus chiliensis	0.00354647
Cellulophaga phage phi19:1	0.00231461		Halovirus HCTV-1	0.00353048
Cellulophaga phage phi39:1	0.00231167		Salmonella phage SSU5	0.00352905
Mycobacterium phage Seagreen	0.00230182		Caulobacter phage Cr30	0.00350533
Cellulophaga phage phi17:2	0.00228713		Helicobacter phage KHP30	0.00347651
Escherichia phage pro483	0.00227395		Prochlorococcus phage P-HM2	0.00347082
Mycobacterium phage SG4	0.00225307		Mycobacterium phage ArcherNM	0.00346785
Lactobacillus phage Ld3	0.00224485		Salmonella phage 9NA	0.00344764
Mycobacterium phage DS6A	0.00219461		Bacillus phage Stills	0.00338387
Erwinia phage PEp14	0.00219006		Clostridium phage CDMH1	0.00335808
Lactococcus phage 712	0.00217908		Vibrio phage KVP40	0.00335015
Bacillus phage phBC6A51	0.00216577		Synechococcus phage S-SM2	0.00334378
Yersinia phage L-413C	0.00216362		Mycobacterium phage Omega	0.00328821
Cafeteria roenbergensis virus BV-PW1	0.00215348		Prochlorococcus phage P-SSM2	0.00324971
Burkholderia phage DC1	0.00214994		Stygiolobus rod-shaped virus	0.00324376
Pseudomonas phage PAK_P4	0.00214125		Staphylococcus phage P108	0.00323623
Bacillus phage G	0.00213811		Vibrio phage VpKK5	0.00321828
Staphylococcus phage 6ec	0.00212648		Mycobacterium phage Llij	0.0032061
Prochlorococcus phage P-SSM2	0.00210724		Mycobacterium phage Phatniss	0.00318143
Haemophilus phage HP1	0.00205482		Escherichia phage PBECO 4	0.00314163
Pseudomonas phage F116	0.00203953		Trichoplusia ni ascovirus 2c	0.00314158
Pseudomonas phage phi3	0.00203706		Escherichia phage phAPEC8	0.00308443
Lactobacillus phage Ld17	0.00201618		Erwinia phage ENT90	0.00308269
Clostridium phage phiCD506	0.00199806		Ruegeria phage DSS3-P1	0.00305823
Vibrio phage martha 12B12	0.00199788		Rhizobium phage 16-3	0.00302805
Staphylococcus phage Stau2	0.00198758		Synechococcus phage S-CBS1	0.00300464
Clostridium phage phi3626	0.00198417		Enterobacteria phage 186	0.00297599
Weissella phage WCP30	0.00197298		Phaeocystis globosa virus	0.00297195
Halovirus HCTV-5	0.00195339		Burkholderia phage DC1	0.00294717
Salmonella phage RE-2010	0.00194869		Marinomonas phage P12026	0.002869
Lactobacillus phage iLp1308	0.00194533		Phage phiJL001	0.00286373
Geobacillus phage GBSV1	0.00191689		Bacillus phage JBP901	0.00285709
Streptococcus phage DT1	0.00190963		Mycobacterium phage Adler	0.0028568
Cellulophaga phage phi46:1	0.00190804		Bacillus phage Moonbeam	0.00282614
Synechococcus phage S-SSM5	0.00188677		Ostreococcus lucimarinus virus OlV1	0.00281834
Mycobacterium phage Papyrus	0.00188187		Lactococcus phage phi7	0.00281443
Arthrobacter phage vB_ArtM-ArV1	0.00186752		Cyanophage S-RIM32	0.00281233
Psychrobacter phage Psymv2	0.00186098		Pseudomonas phage F116	0.00279582
Cronobacter phage vB_CsaM_GAP32	0.00185365		Clostridium phage phiCD481-1	0.00277467
Flavobacterium phage 11b	0.00184615		Bacillus phage BM5	0.0027612
Pelagibacter phage HTVC008M	0.00180559		Streptococcus phage phiARI0746	0.00274665
Streptomyces phage phiSASD1	0.00179356		Amsacta moorei entomopoxvirus 'L'	0.00274518
Enterobacteria phage SfV	0.00179327		Clostridium phage phi3626	0.00271993
Ostreococcus lucimarinus virus OlV5	0.00178271		Enterobacteria phage P2	0.00271297
Paenibacillus phage PG1	0.00176611		Mycobacterium phage Qyrzula	0.00271289
Enterococcus phage SANTOR1	0.00175266		Mycobacterium phage Hawkeye	0.00270504
Halovirus HF1	0.00175192		Emiliania huxleyi virus 86	0.00268484
Mycobacterium phage Gardann	0.00174929		Mannheimia phage phiMHaA1	0.00263973
Synechococcus phage S-SM2	0.00174233		Lactobacillus phage LL-H	0.00262953
Acidianus filamentous virus 8	0.00174137		Idiomarinaceae phage 1N2-2	0.00262091
Streptomyces phage mu1/6	0.00174068		Pelagibacter phage HTVC010P	0.00261197
Lactobacillus phage phi jlb1	0.00173727		Abalone shriveling syndrome-associated virus	0.00260748
Cyanophage MED4-184	0.00173464		Acidianus tailed spindle virus	0.00257405
Clostridium phage phiCP13O	0.00173455		Streptococcus phage 7201	0.00256969
Bacillus phage phi4B1	0.00171957		Halovirus HRTV-4	0.00255128
Liberibacter phage SC2	0.00170484		Mycobacterium phage Giles	0.00252554
Enterobacteria phage Sf6	0.00170283		Rhodoferax phage P26218	0.00250962
Enterobacteria phage phiV10	0.00170017		Lactobacillus phage Lc-Nu	0.00249923
Yersinia phage vB_YenP_AP10	0.0016945		Rhizobium phage vB_RleS_L338C	0.00249558
Erwinia phage vB_EamP-L1	0.00169247		Mycobacterium phage Wanda	0.00248645
Bacillus phage phi105	0.00169062		Burkholderia phage phiE12-2	0.00248397
Podovirus Lau218	0.00168633		Lactococcus phage ul36	0.00247668
Pseudomonas phage JBD25	0.00168092		Mycobacterium phage MiaZeal	0.0024684
Cellulophaga phage phiST	0.0016807		Brochothrix phage NF5	0.00246629
Enterobacteria phage HK97	0.0016733		Infectious spleen and kidney necrosis virus	0.00245515
Vibrio phage VP2	0.00166822		Ralstonia phage RSF1	0.00245334
Bacteriophage APSE-2	0.00166764		Halovirus HRTV-8	0.002446
Shewanella sp. phage 3/49	0.00165543		Vibrio phage pYD38-B	0.00244177
Acidianus filamentous virus 3	0.00164364		Pseudomonas phage gh-1	0.00243949
Rhodobacter phage RcapNL	0.00164202		Paenibacillus phage PG1	0.00242102
Vibrio phage SIO-2	0.00163785		Lactococcus phage TP901-1	0.00241954
Cyanophage KBS-S-2A	0.00163519		Enterococcus phage phiFL4A	0.00240746
Enterobacteria phage HK022	0.00163146		Halovirus HF1	0.00240156
Anopheles minimus irodovirus	0.00163127		Halovirus HRTV-5	0.00239411
Staphylococcus phage P954	0.00163106		Listeria phage A006	0.00239053
Psychrobacter phage pOW20-A	0.00162938		Mycobacterium phage Porky	0.00238853
Staphylococcus phage StB20	0.00162484		Mycobacterium phage Goku	0.00238319
Brucella phage Tb	0.00161572		Brucella phage Pr	0.00238247
Sulfitobacter phage pCB2047-A	0.00161558		Bacillus phage phBC6A52	0.00236891
Staphylococcus phage SAP-26	0.00161341		Streptococcus phage phi3396	0.00236547
Enterococcus phage IME_EF3	0.00160579		Vibrio phage VvAW1	0.00235605
Bacillus phage phi4J1	0.00160256		Lactobacillus phage CL2	0.00235186
Gordonia phage GMA6	0.00159579		Cellulophaga phage phi17:1	0.00235034
Lactobacillus phage Sha1	0.00159334		Bacillus phage BCP78	0.00233421
Phaeocystis globosa virus	0.00158988		Clostridium phage vB_CpeS-CP51	0.00233039
Halocynthia phage JM-2012	0.00158964		Cellulophaga phage phi18:1	0.00232557
Staphylococcus phage IME-SA4	0.00158888		Bacillus phage phi105	0.00231753
Salmonella phage f18SE	0.00158793		Vibrio phage phiVC8	0.00231182
Salmonella phage SE1	0.00158517		Acidianus filamentous virus 6	0.00230277
Ralstonia phage RS138	0.00158517		Enterobacterial phage mEp234	0.00230271
Clostridium phage phiCT453A	0.00157701		Cronobacter phage phiES15	0.0022799
Staphylococcus phage 92	0.00156686		Mycobacterium phage Leo	0.0022795
Bordetella phage BPP-1	0.00156458		Lactobacillus phage Lrm1	0.00227905
Salmonella phage Fels-1	0.00155615		Salmonella phage SPN9CC	0.00227115
Edwardsiella phage MSW-3	0.00155532		Bacillus phage Slash	0.00226759
Streptococcus phage EJ-1	0.00154847		Acidianus filamentous virus 3	0.00225313
Gordonia phage Lucky10	0.00154689		Streptomyce phage TG1	0.00225174
Pseudomonas phage 73	0.00154617		Enterobacteria phage HK022	0.00223643
Salmonella phage epsilon34	0.00154556		Listeria phage vB_LmoS_293	0.00223599
Edwardsiella phage eiAU-183	0.00154552		Sulfolobales virus YNP1	0.00223046
Haemophilus phage Aaphi23	0.00154494		Salmonella phage g341c	0.0022242
Streptococcus phage O1205	0.00154344		Salmonella phage ST160	0.00222361
Staphylococcus phage 23MRA	0.00154261		Bacillus phage PBC1	0.00221399
Streptomyces phage SF1	0.00154076		Acidianus filamentous virus 9	0.00221356
Acinetobacter phage phiAC-1	0.0015384		Gordonia phage GMA1	0.00221168
Salmonella phage SE2	0.00153822		Fowlpox virus	0.00221099
Staphylococcus phage X2	0.00153047		Paenibacillus phage phiIBB_Pl23	0.00220702
Mycobacterium phage Panchino	0.0015278		Clostridium phage phiCD111	0.0021929
Klebsiella phage vB_KpnP_SU552A	0.00152503		Enterobacteria phage P22	0.00218428
Ralstonia phage RSJ5	0.0015198		Anabaena phage A-4L	0.00218292
Listeria phage LP-101	0.00151904		Thermoanaerobacterium phage THSA-485A	0.00217313
Lactobacillus phage phiadh	0.00151841		Streptococcus phage phiARI0468-2	0.00216036
Caulobacter phage CcrSwift	0.00151639		Mycobacterium phage Xeno	0.0021497
Staphylococcus phage phiN315	0.00150818		Staphylococcus phage phiSa119	0.00213936
Paenibacillus phage Harrison	0.00150249		Staphylococcus phage SA13	0.00213675
Bacillus phage SP-15	0.001498		Listeria phage B025	0.0021367
Bacillus phage phIS3501	0.00149734		Pseudomonas phage AF	0.0021349
Vibrio phage CHOED	0.00149706		Synechococcus phage S-CAM8	0.00212679
Staphylococcus phage YMC/09/04/R1988	0.00149539		Gordonia phage Lucky10	0.00212049
Vibrio phage CP-T1	0.00149428		Acinetobacter phage IME_AB3	0.002117
Yellowstone lake phycodnavirus 1	0.00149182		Acinetobacter phage phiAC-1	0.00210887
Bacillus phage SPBc2	0.00148383		Aeromonas phage 31	0.00210766
Acinetobacter phage YMC11/12/R2315	0.00148249		Klebsiella phage K64-1	0.00210355
Salmonella phage E1	0.00147574		Edwardsiella phage PEi21	0.00210099
Proteus phage PM 93	0.00147189		Shewanella sp. phage 1/41	0.00209462
Staphylococcus phage EW	0.00146808		Mycobacterium phage Carcharodon	0.00208646
Brevibacillus phage Abouo	0.00145951		Bacillus phage SPP1	0.00207082
Pseudomonas phage LUZ24	0.00145717		Staphylococcus phage phiNM3	0.00206842
Paenibacillus phage Vegas	0.00145628		Synechococcus phage S-CBP4	0.00206439
Cyanophage KBS-P-1A	0.00145383		Synechococcus phage S-CRM01	0.00204156
Synechococcus phage S-CBP3	0.00144936		Escherichia phage TL-2011b	0.00203503
Vibriophage VpV262	0.00144492		Acinetobacter phage YMC11/12/R2315	0.00203222
Oenococcus phage phiS11	0.0014377		Bacteroides phage B40-8	0.00202846
Gordonia phage Cozz	0.00142669		Prochlorococcus phage P-GSP1	0.00202774
Pseudomonas phage K5	0.00141826		Bacteriophage Lily	0.00202742
Clostridium phage phiCT9441A	0.00141771		Sodalis phage SO-1	0.00201768
Bacillus phage BCD7	0.00141697		Salmonella phage 64795_sal3	0.00200999
Clostridium phage phiCTC2A	0.00141394		Fowl adenovirus C	0.00199568
Aeromonas phage 65	0.00141317		Cyanophage KBS-P-1A	0.00199293
Mycobacterium phage Donovan	0.00140969		Gordonia phage Splinter	0.00198737
Escherichia phage phiEB49	0.00140915		Staphylococcus phage 42E	0.00198724
Burkholderia phage BcepB1A	0.00140264		Synechococcus phage S-CBP3	0.00198681
Pectobacterium phage phiTE	0.00140114		Paramecium bursaria Chlorella virus FR483	0.00198592
Vibrio phage pYD38-A	0.00139812		Bacillus phage Shbh1	0.00198007
Mycobacterium phage Brusacoram	0.00139619		Nocardia phage NBR1	0.00197522
Acanthocystis turfacea Chlorella virus 1	0.00138485		Prochlorococcus phage P-SSP3	0.00197274
Burkholderia phage Bcep1	0.00137999		Enterobacteria phage N15	0.00196521
Achromobacter phage 83-24	0.00137887		Gordonia phage Cozz	0.00195572
Pectobacterium phage ZF40	0.0013721		Clostridium phage phiCT9441A	0.00194342
Enterobacteria phage lambda	0.00137074		Phage cdtI	0.00193821
Synechococcus phage S-RSM4	0.0013676		Flavobacterium phage FCL-2	0.00193324
Burkholderia phage phi644-2	0.0013659		Cyanophage P-TIM40	0.00193258
Klebsiella phage JD001	0.00136198		Paramecium bursaria Chlorella virus 1	0.00192925
Escherichia virus T1	0.00136136		Staphylococcus phage phi7401PVL	0.00192874
Mycobacterium phage BigNuz	0.00135725		Erwinia phage phiEt88	0.00192764
Saimiriine herpesvirus 4	0.00135204		Iodobacteriophage phiPLPE	0.00192057
Bacillus phage Glittering	0.00135003		Cyanophage NATL2A-133	0.00191722
Riemerella phage RAP44	0.00134776		Pandoravirus dulcis	0.0019101
Pseudomonas phage VCM	0.0013463		Aurantimonas phage AmM-1	0.00190663
Lactobacillus phage JCL1032	0.00134492		Rhodococcus phage RGL3	0.00189584
Myxococcus phage Mx8	0.00134218		Yaba-like disease virus	0.00189113
Escherichia phage PBECO 4	0.00133688		Ostreococcus mediterraneus virus 1	0.0018859
Gordonia phage Utz	0.00133587		African swine fever virus	0.00187523
Polaribacter phage P12002S	0.00133375		Pseudomonas phage PS-1	0.0018727
Mycobacterium phage Severus	0.0013325		Pseudomonas phage JBD44	0.00185868
Mannheimia phage vB_MhS_535AP2	0.0013276		Ostreococcus lucimarinus virus 2	0.00185709
Bacillus phage AR9	0.00132415		Tetrasphaera phage TJE1	0.00185166
Cellulophaga phage phi14:2	0.00132414		Gordonia phage Obliviate	0.00184914
Thermus phage phiYS40	0.00130897		Vibrio phage nt-1	0.00184115
Mycobacterium phage Bxz2	0.00130583		Shewanella sp. phage 1/44	0.00183595
Mycobacterium phage Rufus	0.00126981		Vibrio phage ICP2	0.00183466
Bacillus phage Deep Blue	0.00126635		Cronobacter phage CR3	0.00183161
Mycobacterium phage Pukovnik	0.00125697		Xanthomonas phage vB_XveM_DIBBI	0.00182343
Rhizobium phage RR1-A	0.001252		Mannheimia phage vB_MhS_535AP2	0.0018199
Mycobacterium phage Thibault	0.00125055		Mollivirus sibericum	0.00181847
Bacillus phage JBP901	0.00125054		Bacillus phage Blastoid	0.00180992
Gordonia phage Nymphadora	0.00124429		Thermus phage phiYS40	0.00179436
Paramecium bursaria Chlorella virus FR483	0.00124176		Sinorhizobium phage phiLM21	0.00179308
Mycobacterium phage Wheeler	0.00124064		Pseudomonas phage phiPSA1	0.00178385
Aeromonas phage pAh6-C	0.00123704		Arthrobacter phage BarretLemon	0.00177689
Mycobacterium phage Redno2	0.0012278		Mycobacterium phage Doom	0.00177236
Clostridium phage phiCDHM19	0.00122449		Streptomyces phage Sujidade	0.00176786
Rhizobium phage vB_RleS_L338C	0.00121367		Klebsiella phage phiKO2	0.00176618
Bacillus phage BM5	0.00120857		Pseudomonas phage PaBG	0.00176526
Gordonia phage BritBrat	0.00119739		Shigella phage pSf-1	0.00175868
Xanthomonas phage Xp15	0.0011921		Bacillus phage phiNIT1	0.00175679
Rhizobium phage vB_RglS_P106B	0.0011867		Mycobacterium phage Zaka	0.00174853
Tsukamurella phage TPA4	0.00118273		Rhizobium phage vB_RleM_P10VF	0.00174763
Mycobacterium phage Sparkdehlily	0.00118141		Mycobacterium phage VohminGhazi	0.00174742
Streptococcus phage Dp-1	0.00117658		Mycobacterium phage Smeadley	0.00173952
Erwinia phage vB_EamM-Y2	0.00117419		Burkholderia phage BcepGomr	0.00173879
Mycobacterium phage Llij	0.00116942		Mycobacterium phage HINdeR	0.00173208
Mycobacterium phage Hamulus	0.00116322		Mycobacterium phage Sheen	0.00172193
Streptomyces phage TP1604	0.00116295		Rhizobium phage RR1-A	0.00171626
Synechococcus phage S-CAM22	0.00115728		Bacillus phage IEBH	0.00171619
Paramecium bursaria Chlorella virus AR158	0.00115727		Mycobacterium phage Echild	0.00171442
Morganella phage MmP1	0.001157		Mycobacterium phage SweetiePie	0.00171364
Synechococcus phage ACG-2014b	0.00115498		Mycobacterium phage Lamina13	0.00171133
Mycobacterium phage Ramsey	0.00113496		Rhizobium phage RHEph06	0.00169648
Pseudomonas phage YuA	0.00113331		Ateline herpesvirus 3	0.00168135
Arthrobacter phage KellEzio	0.00112931		Clostridium phage phiCDHM19	0.00167855
Mycobacterium phage Enkosi	0.00112585		Brevibacillus phage Jimmer1	0.00167802
Rhodococcus phage ReqiPine5	0.00112245		Rhizobium phage vB_RleM_PPF1	0.00167205
Citrobacter phage Margaery	0.00111937		Sphingomonas phage PAU	0.00166178
Synechococcus phage S-CRM01	0.00111698		Mycobacterium phage Myrna	0.00166104
Pseudomonas phage PaMx11	0.00111032		Pseudomonas phage PaMx28	0.00165378
Rhizobium phage 16-3	0.00110447		Puniceispirillum phage HMO-2011	0.00164858
Escherichia phage TL-2011c	0.00109849		Xanthomonas phage Xp15	0.00163415
Prochlorococcus phage P-SSM7	0.0010948		Mycobacterium phage Sbash	0.00163234
Tsukamurella phage TPA2	0.00108209		Ralstonia phage RSL2	0.00162794
Clostridium phage c-st	0.00107415		Synechococcus phage S-RIM8 A.HR1	0.00159692
Pseudomonas phage PAE1	0.00106919		Cellulophaga phage phi19:1	0.00158645
Mycobacterium phage Validus	0.00106432		Vibrio phage douglas 12A4	0.00158193
Vibrio phage 11895-B1	0.00105167		Synechococcus phage S-SM1	0.00157061
Synechococcus phage ACG-2014i	0.00104552		Synechococcus phage S-MbCM6	0.00155309
Mycobacterium phage MosMoris	0.00101902		Aeromonas phage 65	0.00154975
Clostridium phage phiCD211	0.0010125		Cyanophage Syn30	0.00152908
Gordonia phage Terrapin	0.000998088		Mycobacterium phage Dante	0.00152781
Shewanella sp. phage 1/4	0.000993598		Synechococcus phage ACG-2014d	0.00152649
Listeria phage P70	0.000989781		Methanothermobacter phage psiM100	0.0015239
Mycobacterium phage Qyrzula	0.000989516		Pseudomonas phage PaMx11	0.00152204
Micromonas pusilla virus 12T	0.000969988		Escherichia phage TL-2011c	0.00150582
Camelpox virus	0.00096953		Mycobacterium phage Estave1	0.00150076
Listeria phage LMSP-25	0.000963279		Enterobacteria phage JenK1	0.00150027
Halovirus HRTV-7	0.000962861		Ostreococcus lucimarinus virus 7	0.00149971
Mycobacterium phage Pipefish	0.000962707		Escherichia phage slur01	0.00148831
Bacillus phage Shanette	0.000957446		Synechococcus phage S-WAM1	0.00147708
Caulobacter phage CcrColossus	0.000949878		Vibrio phage ValKK3	0.00146943
Enterobacteria phage N4	0.000947694		Ostreococcus lucimarinus virus OlV5	0.00146626
Corynebacterium phage P1201	0.000941974		Shigella phage POCJ13	0.00145356
Mycobacterium phage Hosp	0.000940801		Synechococcus phage S-MbCM7	0.00144424
Rhodococcus phage E3	0.000932691		Short-finned eel ranavirus	0.00143562
Klebsiella phage vB_KpnM_KB57	0.000929925		Brochothrix phage A9	0.00143449
Synechococcus phage S-CAM7	0.000922866		Ostreococcus tauri virus 1	0.00142579
Enterobacter phage IME11	0.000916131		Sulfolobus monocaudavirus SMV3	0.00141686
Enterococcus phage ECP3	0.000913751		Sinorhizobium phage phiM12	0.00140426
Bacillus phage 0305phi8-36	0.000910951		Rhodothermus phage RM378	0.0014031
Cronobacter phage vB_CsaM_GAP31	0.000898792		Lactococcus phage WRP3	0.00140202
Aureococcus anophagefferens virus	0.000896199		Mycobacterium phage MosMoris	0.00139688
Silicibacter phage DSS3phi2	0.00089107		Clostridium phage phiCD211	0.00138795
Dinoroseobacter phage DFL12phi1	0.000886117		Lactobacillus phage LP65	0.00138588
Thermus phage TMA	0.00087777		Gordonia phage Terrapin	0.00136819
Mycobacterium phage Cjw1	0.000875579		Escherichia phage ECML-117	0.00136322
Cellulophaga phage phi19:3	0.000874853		Vibrio phage qdvp001	0.00135276
Pseudoalteromonas phage pYD6-A	0.000865649		Mycobacterium phage Rosebush	0.00135057
Mycobacterium phage Pleione	0.000854622		Escherichia phage Pollock	0.00133309
Vibrio phage SHOU24	0.000854139		Listeria phage LMSP-25	0.00132048
Bacillus phage Grass	0.000848828		Mycobacterium phage Corndog	0.00130611
Bacillus phage Stahl	0.000829511		Pectobacterium phage phiTE	0.00128047
Gordonia phage Orchid	0.000824347		Cellulophaga phage phi18:3	0.00127566
Mycobacterium phage PegLeg	0.000821242		Bacillus phage SP10	0.00126591
Bacillus phage Staley	0.000814191		Burkholderia ambifaria phage BcepF1	0.00125853
Salmonella phage SEN22	0.000804156		Brazilian marseillevirus	0.00125784
Streptomyces phage phiC31	0.000801181		Cellulophaga phage phi46:3	0.00124912
Thermus phage P74-26	0.000797941		Sulfitobacter phage EE36phi1	0.00124291
Erwinia phage phiEa21-4	0.000786081		Staphylococcus phage SA1	0.00123741
Yellowstone lake phycodnavirus 2	0.000777381		Gordonia phage Woes	0.00123572
Enterobacteria phage JS10	0.000775541		Enterococcus phage EFDG1	0.00123501
Human herpesvirus 4	0.000773862		Caulobacter phage CcrKarma	0.00123253
Prochlorococcus phage Syn33	0.00076293		Arthrobacter phage vB_ArS-ArV2	0.00121932
Synechococcus phage Syn19	0.000758815		Sulfolobus virus STSV1	0.00121041
Citrobacter phage Moogle	0.000755504		Mycobacterium phage Dusk	0.00120969
Pseudomonas phage PAK_P3	0.000754664		Mycobacterium phage Kostya	0.00120216
Pseudaletia unipuncta granulovirus	0.000752601		Sulfolobus virus STSV2	0.00119748
Flavobacterium phage Fpv3	0.000751898		Erwinia phage vB_EamM_Phobos	0.00119132
Synechococcus phage syn9	0.000749956		Mycobacterium phage Rizal	0.00118441
Campylobacter phage CP220	0.000748968		Mycobacterium phage ScottMcG	0.00118346
Flavobacterium phage Fpv2	0.000746923		Helicoverpa zea nudivirus 2	0.00118042
Cyanophage Syn30	0.000743635		Escherichia phage 172-1	0.00117952
Staphylococcus phage StB12	0.000743423		Pandoravirus inopinatum	0.00117826
Salmonella phage 7-11	0.000739397		Mycobacterium phage DrDrey	0.00117798
Prochlorococcus phage P-SSP7	0.00073751		Mycobacterium phage ET08	0.00117259
Pseudomonas phage PaP1	0.000724894		Mycobacterium phage Bipper	0.00117094
Prochlorococcus phage P-HM2	0.000723411		Cellulophaga phage phiST	0.00115197
Paramecium bursaria Chlorella virus NY2A	0.000721309		Lactococcus phage KSY1	0.00115025
Pseudomonas phage tf	0.000718439		Mycobacterium phage Tonenili	0.00113224
Gordonia phage Bantam	0.000718121		Gordonia phage Orchid	0.00113003
Ostreococcus tauri virus OtV5	0.000712148		Cyanophage S-TIM5	0.00112905
Gordonia phage OneUp	0.00071047		Proteus phage vB_PmiM_Pm5461	0.00112522
Planktothrix phage PaV-LD	0.000697632		Bacillus phage Kida	0.0011241
Cyanophage S-RIM32	0.000683858		Bacillus phage B4	0.00112102
Gordonia phage Yvonnetastic	0.000677464		Achromobacter phage JWF	0.00111768
Prochlorococcus phage P-TIM68	0.000673726		Bacillus phage Staley	0.00111611
Invertebrate iridescent virus 30	0.000669749		Acinetobacter phage Acj61	0.00111079
Klebsiella phage KP36	0.000667406		Sulfitobacter phage pCB2047-A	0.00110733
Halovirus HVTV-1	0.000649768		Nitrincola phage 1M3-16	0.00110552
Alteromonas phage vB_AmaP_AD45-P1	0.000639819		Streptomyces phage phiC31	0.00109827
Colwellia phage 9A	0.000633563		Vibrio phage X29	0.001096
Ambystoma tigrinum virus	0.000625246		Bacillus phage AR9	0.0010891
Vibrio phage henriette 12B8	0.000620079		Neodiprion abietis nucleopolyhedrovirus	0.00108156
Sphingomonas phage PAU	0.000606127		Shigella phage SHSML-52-1	0.00107459
Salmonella phage 118970_sal2	0.00058227		Corynebacterium phage BFK20	0.00106046
Lactococcus phage 949	0.000579287		Enterobacteria phage vB_KleM-RaK2	0.00105419
Synechococcus phage S-SSM7	0.000570974		Pithovirus sibericum	0.00104577
Epiphyas postvittana NPV	0.000560646		Enterobacteriaphage UAB_Phi87	0.00104034
Pectobacterium phage My1	0.00054484		Synechococcus phage Syn19	0.0010402
Vibrio phage nt-1	0.000537241		Synechococcus phage S-SSM5	0.00103456
Scale drop disease virus	0.000535105		Enterobacteria phage RB16	0.00103103
Burkholderia phage BcepIL02	0.00053005		Citrobacter phage Margaery	0.00102296
Staphylococcus phage SPbeta-like	0.000520517		Salmonella phage 7-11	0.00101358
Vibrio phage PWH3a-P1	0.000514758		Pseudomonas phage vB_PsyM_KIL1	0.00100646
Staphylococcus phage Twort	0.00050865		Paramecium bursaria Chlorella virus NY2A	0.000988782
Pseudoalteromonas phage H101	0.000504034		Ostreococcus tauri virus 2	0.00098842
Listeria phage List-36	0.000503847		Staphylococcus phage vB_SepS_SEP9	0.000986147
Listeria phage LMTA-148	0.000501608		Pseudomonas phage PAK_P4	0.000978418
Bacillus phage SPO1	0.000501528		Tokyovirus A1	0.000978106
Brevibacillus phage Sundance	0.000495149		Ostreococcus tauri virus OtV5	0.000976223
Staphylococcus phage vB_SauM_Remus	0.000493777		Gordonia phage OneUp	0.000973922
Ovine herpesvirus 2	0.000491979		Staphylococcus phage 6ec	0.000971669
Bacillus phage JL	0.000482052		Bacillus phage BCD7	0.000971203
Bacillus phage Shbh1	0.000481483		Turkeypox virus	0.000966794
Vibrio phage eugene 12A10	0.00048095		Pseudomonas phage OBP	0.000960153
Bacillus phage CP-51	0.000479479		Prochlorococcus phage Syn1	0.000953338
Staphylococcus phage G1	0.000479282		Synechococcus phage S-CAM4	0.000949425
Staphylococcus phage P108	0.000472161		Synechococcus phage S-RSM4	0.00093736
Lactobacillus phage Lb338-1	0.000467829		Acinetobacter phage vB_AbaM_Acibel004	0.000913835
Staphylococcus phage phiIPLA-RODI	0.00046705		Halovirus HVTV-1	0.000890712
Sinorhizobium phage phiM9	0.000445547		Lymphocystis disease virus 1	0.000887814
Bacillus phage Bcp1	0.000435165		Sinorhizobium phage phiN3	0.000881771
Mycobacterium phage ScottMcG	0.000431664		Acinetobacter phage vB_AbaM_phiAbaA1	0.000868747
Mycobacterium phage MoMoMixon	0.000430111		Colwellia phage 9A	0.000868498
Feldmannia species virus	0.000429922		Frog virus 3	0.000860568
Mycobacterium phage ArcherS7	0.000424658		Lactobacillus phage LfeInf	0.000859205
Bacillus phage W.Ph.	0.00042374		Mycobacterium phage Thibault	0.000857136
Deftia phage phiW-14	0.000422156		Cyanophage PSS2	0.000847547
Bacillus phage BCP8-2	0.000417949		Synechococcus phage S-CAM7	0.000843386
Acinetobacter phage 133	0.00041604		Enterobacteria phage EPS7	0.000818236
Testudinid herpesvirus 3	0.000414595		Erwinia phage vB_EamM_EarlPhillipIV	0.000813957
Mycobacterium phage Tonenili	0.00041298		Salmonella phage 118970_sal2	0.000798185
Proteus phage vB_PmiM_Pm5461	0.000410421		Lausannevirus	0.000788485
Yersinia phage vB_YenM_TG1	0.000410137		Golden mussel marseillevirus	0.000758188
Bacillus phage B4	0.000408888		Salmon gill poxvirus	0.000754556
Morganella phage vB_MmoM_MP1	0.000407373		Escherichia phage Av-05	0.000753582
Only Syngen Nebraska virus 5	0.000406445		Erwinia phage vB_EamM_ChrisDB	0.00074446
Acinetobacter phage Acj61	0.000405158		Pandoravirus salinus	0.000736795
Ralstonia phage RSP15	0.000396635		Burkholderia phage BcepIL02	0.0007266
Ectocarpus siliculosus virus 1	0.000396216		Vibrio phage 11895-B1	0.000720825
Klebsiella phage PKO111	0.000393958		Vibrio phage PWH3a-P1	0.000705638
Yersinia phage phiR1-RT	0.000393839		Helicoverpa armigera NPV	0.000696983
Acinetobacter phage Acj9	0.000391202		Ecotropis obliqua NPV	0.000694619
Macacine herpesvirus 4	0.000388575		Pseudoalteromonas phage H101	0.000690938
Yellowstone lake phycodnavirus 3	0.000387764		Streptomyces phage Jay2Jay	0.000682514
Human herpesvirus 4 type 2	0.000384823		Shewanella sp. phage 1/4	0.000681019
Enterobacteria phage vB_KleM-RaK2	0.000384511		Autographa californica nucleopolyhedrovirus	0.000680663
Klebsiella phage K64-1	0.000383631		Spodoptera exigua MNPV	0.000672045
Aeromonas phage 44RR2.8t	0.00038299		Escherichia phage slur16	0.000665737
Synechococcus phage S-CAM9	0.000380276		Shewanella sp. phage 1/40	0.000655641
Campylobacter phage CPt10	0.00037835		Caulobacter phage CcrColossus	0.000651053
Synechococcus phage S-MbCM6	0.000377656		Singapore grouper iridovirus	0.000650368
Klebsiella phage Matisse	0.000377574		Mythimna separata entomopoxvirus 'L'	0.00064824
Enterobacteria phage Lw1	0.000377261		Staphylococcus phage phiIPLA-C1C	0.000646539
Citrobacter phage IME-CF2	0.000374159		Staphylococcus phage MCE-2014	0.000642229
Synechococcus phage ACG-2014d	0.000371189		Lactobacillus phage Lb338-1	0.000641307
Golden mussel marseillevirus	0.000368729		Cellulophaga phage phi17:2	0.000627046
Cronobacter phage S13	0.000365004		Enterococcus phage ECP3	0.000626292
Ostreococcus lucimarinus virus 7	0.000364675		Glypta fumiferanae ichnovirus	0.000625087
Equid herpesvirus 5	0.000364533		Cellulophaga phage phi4:1	0.000624802
Campylobacter phage CP21	0.00036363		Bacillus phage CampHawk	0.0006234
Micromonas sp. RCC1109 virus MpV1	0.000361138		Sinorhizobium phage phiM9	0.000610762
Ostreococcus tauri virus 2	0.000360523		Thermus phage TMA	0.00060163
Synechococcus phage S-WAM1	0.000359173		Dickeya phage Limestone	0.000597904
Synechococcus phage S-WAM2	0.000356699		Bacillus phage Bcp1	0.000596531
Synechococcus phage S-MbCM7	0.000351187		Pseudomonas phage PhiPA3	0.000589485
Synechococcus phage S-CAM4	0.000346299		Mycobacterium phage Cali	0.000586571
Cyanophage P-RSM6	0.000345375		Salmonella phage Marshall	0.000582947
Cedratvirus A11	0.000338587		Mycobacterium phage Wildcat	0.000581463
Synechococcus phage S-CAM1	0.000335754		Deftia phage phiW-14	0.000578697
Synechococcus phage S-CAM3	0.000335454		Salmonella phage Det7	0.000578653
Armadillidium vulgare iridescent virus	0.000301894		Acinetobacter phage 133	0.000570314
Ralstonia phage RSL2	0.000296892		Rabbit fibroma virus	0.000570114
Synechococcus phage ACG-2014f	0.000291412		Aeromonas phage Aes012	0.000562649
Human herpesvirus 5	0.000282133		Yersinia phage vB_YenM_TG1	0.000562222
Vibrio phage KVP40	0.000271546		BeAn 58058 virus	0.000559104
Erwinia phage vB_EamM_Asesino	0.000269939		Anopheles minimus irodovirus	0.000559042
Vibrio phage VH7D	0.000269204		Escherichia phage vB_EcoM_PhAPEC2	0.000544692
Pseudomonas phage PaBG	0.00025755		Enterobacteria phage T4	0.00053958
Yersinia phage phiR1-37	0.000253376		Synechococcus phage S-MbCM100	0.000534721
Erwinia phage Ea35-70	0.000245251		Enterobacteria phage vB_EcoM_VR25	0.000533519
Pseudomonas phage phiKZ	0.000237159		Yellowstone lake phycodnavirus 2	0.000532823
Pseudomonas phage Lu11	0.000236986		Citrobacter phage Merlin	0.000527616
Glypta fumiferanae ichnovirus	0.000227998		Klebsiella phage KP27	0.000522534
Choristoneura biennis entomopoxvirus 'L'	0.000216073		Synechococcus phage S-RIM2 R1_1999	0.000519505
Pseudomonas phage PhiPA3	0.000215013		Yoka poxvirus	0.000518709
Mollivirus sibericum	0.000204087		Pseudaletia unipuncta granulovirus	0.000515838
Tokyovirus A1	0.00017838		Synechococcus phage syn9	0.000514026
Megavirus chiliensis	0.000158395		Prochlorococcus phage P-SSM3	0.000508965
Ralstonia phage RSL1	0.000143745		Synechococcus phage S-ShM2	0.000507547
Pandoravirus dulcis	0.00013934		Canarypox virus	0.000506522
Paramecium bursaria Chlorella virus 1	0.000100527		Citrobacter phage vB_CfrM_CfP1	0.0005057
Acanthamoeba polyphaga moumouvirus	6.5094e-05		Cronobacter phage S13	0.000500353
Pandoravirus salinus	2.68743e-05		Campylobacter phage CP21	0.00049847
			Synechococcus phage S-WAM2	0.000488968
			Cyanophage P-RSM6	0.000473445
			Vaccinia virus	0.000468062
			Monkeypox virus Zaire-96-I-16	0.000462957
			Synechococcus phage S-CAM1	0.000460256
			Camelpox virus	0.000443016
			Pseudomonas phage EL	0.000431488
			Abalone herpesvirus Victoria/AUS/2009	0.00043087
			Invertebrate iridescent virus 6	0.000428915
			Aeromonas phage PX29	0.000410515
			Caulobacter phage CcrRogue	0.00040737
			Ralstonia phage RSL1	0.000394095
			Aeromonas phage CC2	0.000393266
			Synechococcus phage S-SSM7	0.00039135
			Aeromonas phage Aeh1	0.000390752
			Melanoplus sanguinipes entomopoxvirus	0.000385976
			Erwinia phage vB_EamM_Kwan	0.000369888
			Acanthamoeba polyphaga mimivirus	0.000347121
			Erwinia phage Ea35-70	0.000336194
			Pseudomonas phage phiKZ	0.000325101
			Pseudomonas phage Lu11	0.000324864
			Choristoneura rosaceana entomopoxvirus 'L'	0.000322157
			Escherichia phage vB_EcoM_JS09	0.000269399
			Escherichia phage 121Q	0.000261487
			Prochlorococcus phage P-SSM4	0.000255644
			Apis mellifera filamentous virus	0.000183597
			Anguillid herpesvirus 1	0.000183353
